# Supplementary material
Source: publisher site journal article supplement (https://www.dovepress.com/article/348710)
Supplement: Supplementary file 1 [file get_supplementary_file.php]

**SUPPLEMENT**

Supplement. Survey Results, n=12

| Questions | Number of % participants |
| --- | --- |
| Question 1. How many cataract surgeries have you done (in a two month period) prior to the COVID-19 pandemic closing the OR to elective surgeries?   1. 5 - 10 cases 2. 11 - 50 cases 3. 51 - 100 cases | 5 41.6%  5 41.6%  2 16.7% |
| Question 2. How many complex cataract surgeries have you done (in a two month period) prior to COVID?   1. 0 - 5 cases 2. 5 - 10 cases 3. 11 - 25 cases | 7 58.3%  3 25.0%  2 16.7% |
| Question 3. How many cataract surgeries have you done (in a two month period) prior to the COVID-19 pandemic closing the OR to elective surgeries?   1. 0 - 5 cases 2. 6 - 10 cases 3. >10 cases | 3 25.0%  4 33.3%  5 41.7% |
| Question 4. Compared to your last cataract surgery before the pandemic closed the OR, how comfortable did you feel with your first surgery after the OR opened again?   1. 1 = Not comfortable at all 2. 2 3. 3 4. 4 5. 5 = Very comfortable | 0 0%  2 16.7%  5 41.6%  5 41.6%  0 0% |
| Question 5. How anxious did you feel in your first case after the OR opened again?   1. 1 = Very Anxious 2. 2 3. 3 4. 4 5. 5 = Not anxious at all | 0 0%  3 25.0%  5 41.7%  4 33.3%  0 0% |
| Question 6. How many cases did it take you OR do you think you’ll need to do before feeling comfortable again?   1. 1 - 2 cases 2. 3 - 5 cases 3. 5 - 8 cases 4. 9 - 10 cases | 1 8.3%  6 50.0%  2 16.7%  3 25.0% |
| Question 7. What resources did you utilize to prepare for your first surgery back?   1. Simulator 2. Wet Lab 3. Watching Videos 4. Nothing 5. Simulator and Watching Videos | 4 33.4%  0 0%  6 50.0%  1 8.3%  1 8.3% |
| Question 8. What in particular was the most anxiety provoking factor upon return to the OR?   1. Feeling out of practice on a particular step (phaco, rhexis, wound, etc) 2. The anticipation that it would be a complex case (white cataract, monocular patient, known trauma, etc) 3. The general environment of the OR in the post COVID world (less relaxed environment, needing to wear an N95, fear of being in a healthcare facility) | 10 83.4%    1 8.3%    1 8.3% |
| Question 9. In retrospect, would you change the way you prepared for returning to the OR to do cataract surgeries?   1. No 2. Yes 3. Unanswered | 8 66.7%  0 0%  4 33.3% |
